# Supplementary material for: Antioxidant Capacity of Free and Bound Phenolics from Olive Leaves: In Vitro and In Vivo Responses
Source: MDPI journal article supplement (doi:10.3390/antiox12122033), 2023-11-23
Supplement: s1 [file s1]

# Antioxidant Capacity of Free and Bound Phenolics from Olive Leaves: In Vitro and In Vivo Responses

Ting Li <sup>1,2,†</sup>, Wenjun Wu <sup>3,†</sup>, Jianming Zhang <sup>1</sup>, Qinghang Wu <sup>1</sup>, Shenlong Zhu <sup>4</sup>, Erli Niu <sup>4</sup>, Shengfeng Wang <sup>5</sup>, Chengying Jiang <sup>3</sup>, Daqun Liu <sup>1,\*</sup> and Chengcheng Zhang <sup>1,\*</sup>

<sup>1</sup> Food Science Institute, Zhejiang Academy of Agricultural Sciences, Hangzhou 310021, China; lt1345600496@126.com (T.L.); zhangjianming@zaas.ac.cn (J.Z.); hang9799@outlook.com (Q.W.)

<sup>2</sup> College of Food and Health, Zhejiang A&F University, Hangzhou 311300, China

<sup>3</sup> Gansu Research Academy of Forestry Science and Technology, Lanzhou 730020, China; wuwenjun121@163.com (W.W.); jcytxb@126.com (C.J.)

<sup>4</sup> Institute of Crop and Nuclear Technology Utilization, Zhejiang Academy of Agricultural Sciences, Hangzhou 310021, China; zhushl@zaas.ac.cn (S.Z.); niuerli@zaas.ac.cn (E.N.)

<sup>5</sup> Research Center of Analysis and Measurement, Zhejiang University of Technology, Hangzhou 310014, China; wsfl027@zjut.edu.cn

\* Correspondence: liudaqun@zaas.ac.cn (D.L.); zhangcc@zaas.ac.cn (C.Z.)

† These authors have contributed equally to this work.

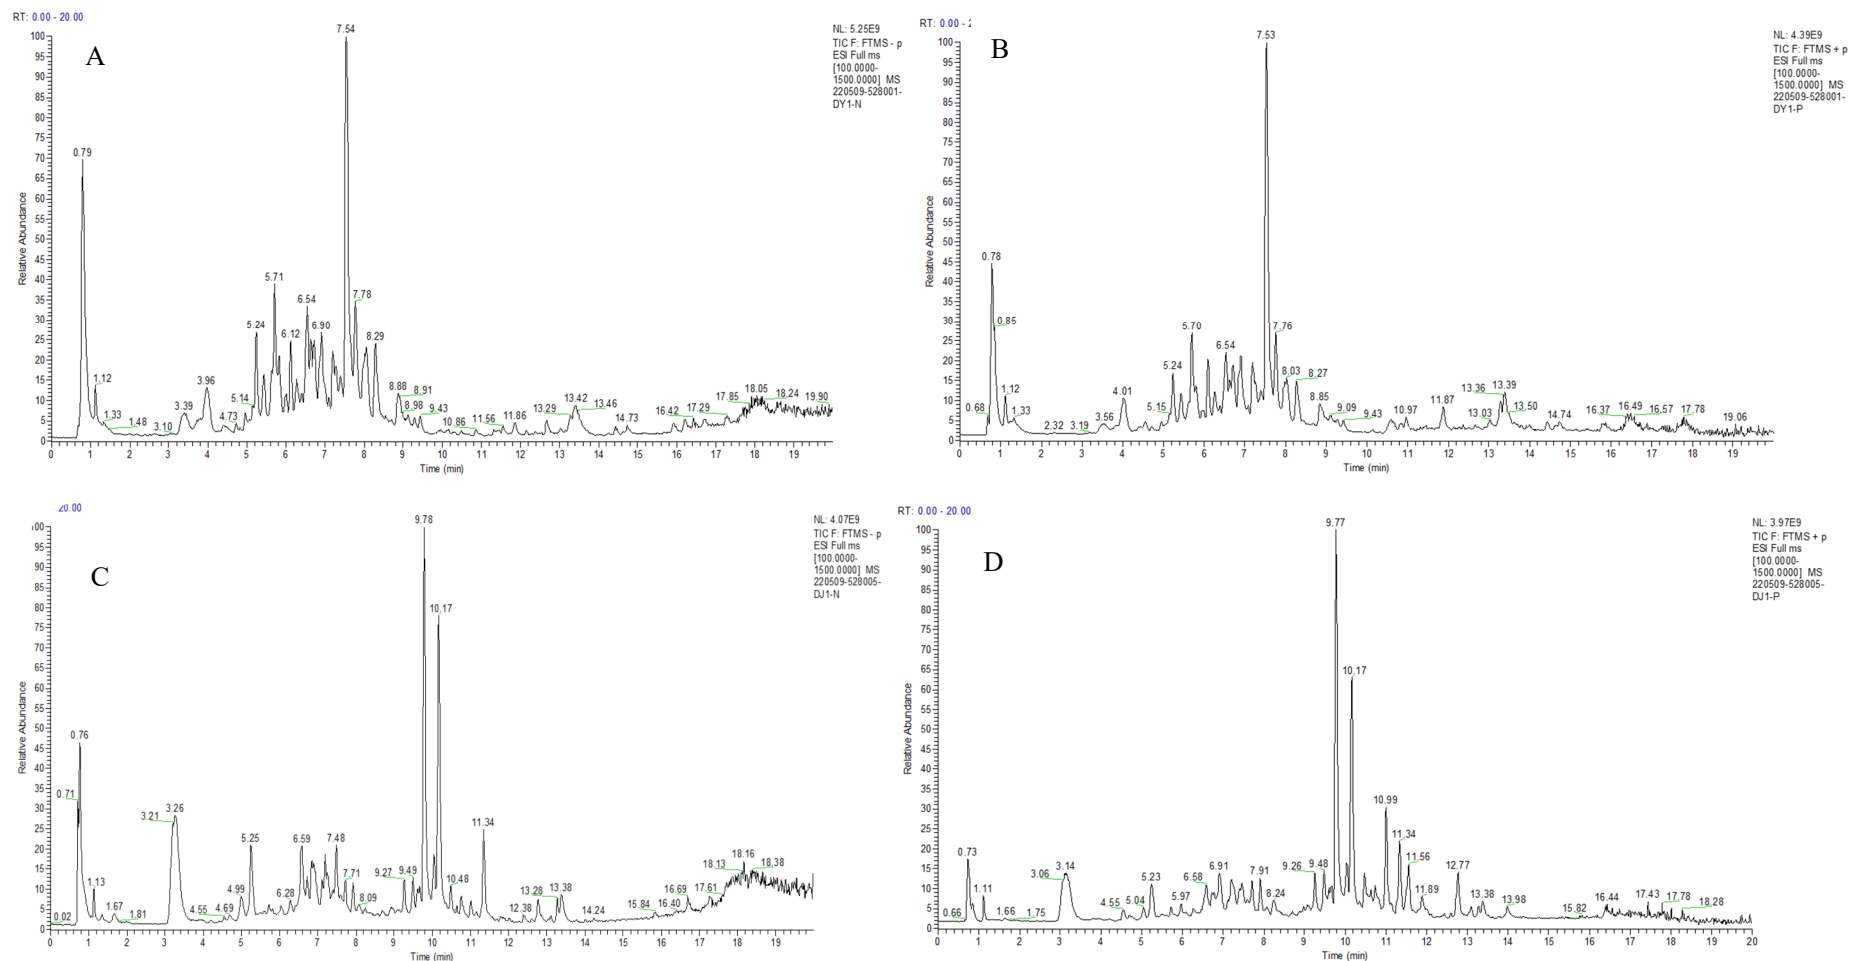

**Figure S1.** Total ion chromatogram (TIC) of free and bound phenolics fractions in olive leaves for negative ion and positive ion mode UPLC-Q-Exactive Orbitrap-MS. (A-B) FPs in negative and positive ion mode; (C-D) BPs in negative and positive ion mode.

Table S1. Calibration curves used for HPLC quantification.

| No. | Calibration curves     | R <sup>2</sup> | Linear range (µg/mL) | Compounds              |
|-----|------------------------|----------------|----------------------|------------------------|
| 1   | $y = 4389.8x + 2982.5$ | 0.9988         | 10-200               | Asiatic acid           |
| 2   | $y = 3946.9x + 1015.3$ | 0.9992         | 12-240               | Maslinic acid          |
| 3   | $y = 3588.9x + 8597.6$ | 0.9989         | 10-200               | Corosolic acid         |
| 4   | $y = 5122.4x + 2077.2$ | 0.9992         | 10-200               | Oleanolic acid         |
| 5   | $y = 4409.7x + 3699.8$ | 0.9986         | 10-200               | Ursolic acid           |
| 6   | $y = 19133x - 30576$   | 0.9997         | 10-200               | Chlorogenic acid       |
| 7   | $y = 41220x - 584378$  | 0.9890         | 24-480               | Caffeic acid           |
| 8   | $y = 68816x - 581501$  | 0.9901         | 15-300               | 4-Coumaric acid        |
| 9   | $y = 12851x - 12745$   | 0.9999         | 25-500               | Sinapinic acid         |
| 10  | $y = 35342x - 75709$   | 0.9994         | 12-240               | Ferulic acid           |
| 11  | $y = 10534x - 1991$    | 0.9997         | 10-200               | Hydroxytyrosol         |
| 12  | $y = 7341.7x - 2253.2$ | 0.9997         | 10-200               | Rutin                  |
| 13  | $y = 12430x + 12561$   | 0.9995         | 10-200               | Luteolin-7-O-glucoside |
| 14  | $y = 11641x - 3972.8$  | 0.9997         | 10-200               | Rhoifolin              |
| 15  | $y = 12855x - 12713$   | 0.9996         | 10.5-210             | Apigenin-7-O-glucoside |
| 16  | $y = 2334.1x - 1014.7$ | 0.9998         | 11-220               | Oleuropein             |
| 17  | $y = 19079x - 15381$   | 0.9998         | 10-200               | Quercetin              |
| 18  | $y = 13704x - 4919.6$  | 0.9998         | 10-200               | Luteolin               |
| 19  | $y = 16509x - 6454.5$  | 0.9997         | 11.5-230             | Kaempferol             |

Table S2. Effect of different concentrations of H<sub>2</sub>O<sub>2</sub> on the viability of HepG2 cells.

| Concentration of H <sub>2</sub> O <sub>2</sub> (μmol/mL) |      | Survival rate (%)         |
|----------------------------------------------------------|------|---------------------------|
| Control                                                  | 0    | 100±6.72 <sup>A</sup>     |
| H <sub>2</sub> O <sub>2</sub>                            | 100  | 109.48±8.47 <sup>A</sup>  |
| H <sub>2</sub> O <sub>2</sub>                            | 200  | 109.08±11.64 <sup>A</sup> |
| H <sub>2</sub> O <sub>2</sub>                            | 400  | 102.95±10.93 <sup>A</sup> |
| H <sub>2</sub> O <sub>2</sub>                            | 800  | 59.99±6.51 <sup>B</sup>   |
| H <sub>2</sub> O <sub>2</sub>                            | 1200 | 38.75±7.52 <sup>C</sup>   |
| H <sub>2</sub> O <sub>2</sub>                            | 1600 | 22.52±2.13 <sup>D</sup>   |
| H <sub>2</sub> O <sub>2</sub>                            | 3200 | 7.86±9.09 <sup>D</sup>    |

Table S3. Effect of the incubation time of H<sub>2</sub>O<sub>2</sub> on the viability of HepG2 cells.

|                                             | Time (h) | Survival rate (%)         |
|---------------------------------------------|----------|---------------------------|
| H <sub>2</sub> O <sub>2</sub> (800 μmol/mL) | 1        | 113.18±14.65 <sup>A</sup> |
| H <sub>2</sub> O <sub>2</sub> (800 μmol/mL) | 2        | 93.51±13.06 <sup>AB</sup> |
| H <sub>2</sub> O <sub>2</sub> (800 μmol/mL) | 4        | 67.65±7.47 <sup>BC</sup>  |
| H <sub>2</sub> O <sub>2</sub> (800 μmol/mL) | 6        | 59.99±6.51 <sup>C</sup>   |
| H <sub>2</sub> O <sub>2</sub> (800 μmol/mL) | 8        | 58.12±9.81 <sup>C</sup>   |

Table S4. Primer sequences for RT-qPCR

| Primer name | Primer sequences (5'-3') |
|-------------|--------------------------|
| Gapdh-F     | AACAGCAACTCCCACTCTTCC    |
| Gapdh-R     | TGGTCCAGGGTTTCTTACTCC    |
| HO-1-F      | CACATCCAAGCCGAGAATGC     |
| HO-1-R      | GTACAAGGAAGCCATCACCAG    |
| GCLC-F      | CACATCTACCACGCAGTCAAG    |
| GCLC-R      | CATCGCCTCCATTTCAGTAACAA  |
| GSTA2-F     | CTTGATGCCAGCCTTCTGAC     |
| GSTA2-R     | TGCCAGGATGTAGGAACTTCTT   |
| NQO1-F      | ATGAAGGAGGCTGCTGTAGAG    |
| NQO1-R      | GCTAGAGATGACTCGGAAGGAT   |
| Nrf2-F      | CCTCAGCATGATGGACTTGGA    |
| Nrf2-R      | ACTTGTACCGCCTCGTCTG      |
